# Supplementary material for: Genome-Wide Association Analysis of Growth Curve Parameters in Chinese Simmental Beef Cattle
Source: Animals (Basel). 2021 Jan 15;11(1):192. doi: 10.3390/ani11010192 (PMC7830728; doi:10.3390/ani11010192)
Supplement: Supplementary file 1 [file animals-11-00192-s001.xlsx]

## Sheet: Sheet1
Table S1. Gene Ontology (GO) and KEGG pathway analysis
#Term	Database	ID	Input number	Background number	P-Value	Corrected P-Value	Input	Hyperlink
Thiamine metabolism	KEGG PATHWAY	bta00730	1	18	0.00915972	0.0319616	280994	http://www.genome.jp/kegg-bin/show_pathway?bta00730/bta:280994%09red
Hippo signaling pathway - multiple species	KEGG PATHWAY	bta04392	1	29	0.014427	0.0369693	533815	http://www.genome.jp/kegg-bin/show_pathway?bta04392/bta:533815%09red
Circadian rhythm	KEGG PATHWAY	bta04710	1	31	0.0153819	0.0370976	511961	http://www.genome.jp/kegg-bin/show_pathway?bta04710/bta:511961%09red
Folate biosynthesis	KEGG PATHWAY	bta00790	1	37	0.0182415	0.04155	280994	http://www.genome.jp/kegg-bin/show_pathway?bta00790/bta:280994%09red
Longevity regulating pathway - multiple species	KEGG PATHWAY	bta04213	1	62	0.0300734	0.0546917	511961	http://www.genome.jp/kegg-bin/show_pathway?bta04213/bta:511961%09red
Adipocytokine signaling pathway	KEGG PATHWAY	bta04920	1	72	0.034769	0.059397	511961	http://www.genome.jp/kegg-bin/show_pathway?bta04920/bta:511961%09red
Staphylococcus aureus infection	KEGG PATHWAY	bta05150	1	75	0.0361736	0.0605353	514076	http://www.genome.jp/kegg-bin/show_pathway?bta05150/bta:514076%09red
Complement and coagulation cascades	KEGG PATHWAY	bta04610	1	87	0.0417728	0.0655513	514076	http://www.genome.jp/kegg-bin/show_pathway?bta04610/bta:514076%09red
Longevity regulating pathway	KEGG PATHWAY	bta04211	1	90	0.0431679	0.0655513	511961	http://www.genome.jp/kegg-bin/show_pathway?bta04211/bta:511961%09red
Cardiac muscle contraction	KEGG PATHWAY	bta04260	1	90	0.0431679	0.0655513	286771	http://www.genome.jp/kegg-bin/show_pathway?bta04260/bta:286771%09red
Hypertrophic cardiomyopathy (HCM)	KEGG PATHWAY	bta05410	1	92	0.0440969	0.0663477	511961	http://www.genome.jp/kegg-bin/show_pathway?bta05410/bta:511961%09red
Glucagon signaling pathway	KEGG PATHWAY	bta04922	1	104	0.0496534	0.0733618	511961	http://www.genome.jp/kegg-bin/show_pathway?bta04922/bta:511961%09red
Insulin resistance	KEGG PATHWAY	bta04931	1	110	0.0524204	0.0760792	511961	http://www.genome.jp/kegg-bin/show_pathway?bta04931/bta:511961%09red
AMPK signaling pathway	KEGG PATHWAY	bta04152	1	123	0.0583899	0.0817883	511961	http://www.genome.jp/kegg-bin/show_pathway?bta04152/bta:511961%09red
FoxO signaling pathway	KEGG PATHWAY	bta04068	1	132	0.0625022	0.0861375	511961	http://www.genome.jp/kegg-bin/show_pathway?bta04068/bta:511961%09red
Insulin signaling pathway	KEGG PATHWAY	bta04910	1	137	0.0647796	0.0878004	511961	http://www.genome.jp/kegg-bin/show_pathway?bta04910/bta:511961%09red
Signaling pathways regulating pluripotency of stem cells	KEGG PATHWAY	bta04550	1	139	0.0656891	0.0881913	529373	http://www.genome.jp/kegg-bin/show_pathway?bta04550/bta:529373%09red
Apelin signaling pathway	KEGG PATHWAY	bta04371	1	140	0.0661435	0.0881913	511961	http://www.genome.jp/kegg-bin/show_pathway?bta04371/bta:511961%09red
Hippo signaling pathway	KEGG PATHWAY	bta04390	1	151	0.0711289	0.0939141	533815	http://www.genome.jp/kegg-bin/show_pathway?bta04390/bta:533815%09red
Oxytocin signaling pathway	KEGG PATHWAY	bta04921	1	152	0.0715809	0.0939141	511961	http://www.genome.jp/kegg-bin/show_pathway?bta04921/bta:511961%09red
Non-alcoholic fatty liver disease (NAFLD)	KEGG PATHWAY	bta04932	1	158	0.0742885	0.0957595	511961	http://www.genome.jp/kegg-bin/show_pathway?bta04932/bta:511961%09red
Cell adhesion molecules (CAMs)	KEGG PATHWAY	bta04514	1	159	0.0747391	0.0957595	782186	http://www.genome.jp/kegg-bin/show_pathway?bta04514/bta:782186%09red
Tight junction	KEGG PATHWAY	bta04530	1	178	0.0832612	0.102668	511961	http://www.genome.jp/kegg-bin/show_pathway?bta04530/bta:511961%09red
Axon guidance	KEGG PATHWAY	bta04360	1	180	0.084154	0.102994	520192	http://www.genome.jp/kegg-bin/show_pathway?bta04360/bta:520192%09red
Calcium signaling pathway	KEGG PATHWAY	bta04020	1	203	0.0943634	0.113791	286771	http://www.genome.jp/kegg-bin/show_pathway?bta04020/bta:286771%09red
Epstein-Barr virus infection	KEGG PATHWAY	bta05169	1	228	0.105341	0.125187	782186	http://www.genome.jp/kegg-bin/show_pathway?bta05169/bta:782186%09red
Thermogenesis	KEGG PATHWAY	bta04714	1	239	0.110131	0.129011	511961	http://www.genome.jp/kegg-bin/show_pathway?bta04714/bta:511961%09red
MAPK signaling pathway	KEGG PATHWAY	bta04010	1	292	0.132882	0.148249	533815	http://www.genome.jp/kegg-bin/show_pathway?bta04010/bta:533815%09red
Metabolic pathways	KEGG PATHWAY	bta01100	1	1468	0.518053	0.521232	280994	http://www.genome.jp/kegg-bin/show_pathway?bta01100/bta:280994%09red
--------------------
#Term	Database	ID	Input number	Background number	P-Value	Corrected P-Value	Input	Hyperlink
--------------------
#Term	Database	ID	Input number	Background number	P-Value	Corrected P-Value	Input	Hyperlink
protein stabilization	Gene Ontology	GO:0050821	2	128	0.00176089	0.0306531	533815|520192	http://amigo.geneontology.org/amigo/term/GO:0050821
nephric duct morphogenesis	Gene Ontology	GO:0072178	1	5	0.002901	0.0306531	520192	http://amigo.geneontology.org/amigo/term/GO:0072178
GPI-linked ephrin receptor activity	Gene Ontology	GO:0005004	1	5	0.002901	0.0306531	520192	http://amigo.geneontology.org/amigo/term/GO:0005004
signaling receptor binding	Gene Ontology	GO:0005102	2	171	0.00308755	0.0306531	512019|782186	http://amigo.geneontology.org/amigo/term/GO:0005102
cell differentiation involved in embryonic placenta development	Gene Ontology	GO:0060706	1	6	0.00338374	0.0306531	533815	http://amigo.geneontology.org/amigo/term/GO:0060706
regulation of dendritic spine morphogenesis	Gene Ontology	GO:0061001	1	6	0.00338374	0.0306531	520192	http://amigo.geneontology.org/amigo/term/GO:0061001
MOZ/MORF histone acetyltransferase complex	Gene Ontology	GO:0070776	1	6	0.00338374	0.0306531	529373	http://amigo.geneontology.org/amigo/term/GO:0070776
negative regulation of long-term synaptic potentiation	Gene Ontology	GO:1900272	1	6	0.00338374	0.0306531	520192	http://amigo.geneontology.org/amigo/term/GO:1900272
neural tube formation	Gene Ontology	GO:0001841	1	7	0.00386626	0.0306531	533815	http://amigo.geneontology.org/amigo/term/GO:0001841
nucleotide-activated protein kinase complex	Gene Ontology	GO:0031588	1	7	0.00386626	0.0306531	511961	http://amigo.geneontology.org/amigo/term/GO:0031588
positive regulation of aspartic-type endopeptidase activity involved in amyloid precursor protein catabolic process	Gene Ontology	GO:1902961	1	7	0.00386626	0.0306531	520192	http://amigo.geneontology.org/amigo/term/GO:1902961
hepatocyte apoptotic process	Gene Ontology	GO:0097284	1	8	0.00434857	0.0306531	533815	http://amigo.geneontology.org/amigo/term/GO:0097284
AMP-activated protein kinase activity	Gene Ontology	GO:0004679	1	8	0.00434857	0.0306531	511961	http://amigo.geneontology.org/amigo/term/GO:0004679
protein kinase regulator activity	Gene Ontology	GO:0019887	1	8	0.00434857	0.0306531	511961	http://amigo.geneontology.org/amigo/term/GO:0019887
limb morphogenesis	Gene Ontology	GO:0035108	1	8	0.00434857	0.0306531	286771	http://amigo.geneontology.org/amigo/term/GO:0035108
complement activation, alternative pathway	Gene Ontology	GO:0006957	1	8	0.00434857	0.0306531	514076	http://amigo.geneontology.org/amigo/term/GO:0006957
glutamatergic synapse	Gene Ontology	GO:0098978	2	215	0.00480481	0.0306531	100139490|520192	http://amigo.geneontology.org/amigo/term/GO:0098978
positive regulation of sequestering of triglyceride	Gene Ontology	GO:0010890	1	9	0.00483066	0.0306531	767984	http://amigo.geneontology.org/amigo/term/GO:0010890
AMP binding	Gene Ontology	GO:0016208	1	9	0.00483066	0.0306531	511961	http://amigo.geneontology.org/amigo/term/GO:0016208
positive regulation of extrinsic apoptotic signaling pathway via death domain receptors	Gene Ontology	GO:1902043	1	9	0.00483066	0.0306531	533815	http://amigo.geneontology.org/amigo/term/GO:1902043
negative regulation of organ growth	Gene Ontology	GO:0046621	1	9	0.00483066	0.0306531	533815	http://amigo.geneontology.org/amigo/term/GO:0046621
negative regulation of axon regeneration	Gene Ontology	GO:0048681	1	9	0.00483066	0.0306531	520192	http://amigo.geneontology.org/amigo/term/GO:0048681
H4 histone acetyltransferase activity	Gene Ontology	GO:0010485	1	9	0.00483066	0.0306531	529373	http://amigo.geneontology.org/amigo/term/GO:0010485
myeloid cell differentiation	Gene Ontology	GO:0030099	1	10	0.00531253	0.0306531	529373	http://amigo.geneontology.org/amigo/term/GO:0030099
ER overload response	Gene Ontology	GO:0006983	1	10	0.00531253	0.0306531	614715	http://amigo.geneontology.org/amigo/term/GO:0006983
regulation of postsynaptic neurotransmitter receptor activity	Gene Ontology	GO:0098962	1	10	0.00531253	0.0306531	100139490	http://amigo.geneontology.org/amigo/term/GO:0098962
signal transduction by protein phosphorylation	Gene Ontology	GO:0023014	1	10	0.00531253	0.0306531	533815	http://amigo.geneontology.org/amigo/term/GO:0023014
negative regulation of cell population proliferation	Gene Ontology	GO:0008285	2	228	0.00537981	0.0306531	533815|286771	http://amigo.geneontology.org/amigo/term/GO:0008285
nuclear-transcribed mRNA catabolic process	Gene Ontology	GO:0000956	1	11	0.00579419	0.0306531	521982	http://amigo.geneontology.org/amigo/term/GO:0000956
activation of cysteine-type endopeptidase activity	Gene Ontology	GO:0097202	1	11	0.00579419	0.0306531	286771	http://amigo.geneontology.org/amigo/term/GO:0097202
stress-activated protein kinase signaling cascade	Gene Ontology	GO:0031098	1	11	0.00579419	0.0306531	533815	http://amigo.geneontology.org/amigo/term/GO:0031098
positive regulation of amyloid-beta formation	Gene Ontology	GO:1902004	1	12	0.00627563	0.031188	520192	http://amigo.geneontology.org/amigo/term/GO:1902004
regulation of short-term neuronal synaptic plasticity	Gene Ontology	GO:0048172	1	12	0.00627563	0.031188	100139490	http://amigo.geneontology.org/amigo/term/GO:0048172
endoplasmic reticulum calcium ion homeostasis	Gene Ontology	GO:0032469	1	13	0.00675685	0.0316322	614715	http://amigo.geneontology.org/amigo/term/GO:0032469
regulation of AMPA receptor activity	Gene Ontology	GO:2000311	1	14	0.00723785	0.0316322	100139490	http://amigo.geneontology.org/amigo/term/GO:2000311
glycogen biosynthetic process	Gene Ontology	GO:0005978	1	14	0.00723785	0.0316322	511961	http://amigo.geneontology.org/amigo/term/GO:0005978
biomineral tissue development	Gene Ontology	GO:0031214	1	15	0.00771864	0.0316322	280994	http://amigo.geneontology.org/amigo/term/GO:0031214
response to antibiotic	Gene Ontology	GO:0046677	1	15	0.00771864	0.0316322	280994	http://amigo.geneontology.org/amigo/term/GO:0046677
hippo signaling	Gene Ontology	GO:0035329	1	15	0.00771864	0.0316322	533815	http://amigo.geneontology.org/amigo/term/GO:0035329
cochlea development	Gene Ontology	GO:0090102	1	15	0.00771864	0.0316322	520192	http://amigo.geneontology.org/amigo/term/GO:0090102
integral component of postsynaptic membrane	Gene Ontology	GO:0099055	1	17	0.00867957	0.0316322	520192	http://amigo.geneontology.org/amigo/term/GO:0099055
cellular response to amyloid-beta	Gene Ontology	GO:1904646	1	17	0.00867957	0.0316322	520192	http://amigo.geneontology.org/amigo/term/GO:1904646
regulation of axonogenesis	Gene Ontology	GO:0050770	1	17	0.00867957	0.0316322	520192	http://amigo.geneontology.org/amigo/term/GO:0050770
protein tyrosine kinase binding	Gene Ontology	GO:1990782	1	17	0.00867957	0.0316322	520192	http://amigo.geneontology.org/amigo/term/GO:1990782
cellular senescence	Gene Ontology	GO:0090398	1	17	0.00867957	0.0316322	529373	http://amigo.geneontology.org/amigo/term/GO:0090398
AMPA glutamate receptor complex	Gene Ontology	GO:0032281	1	18	0.00915972	0.0319616	100139490	http://amigo.geneontology.org/amigo/term/GO:0032281
adherens junction organization	Gene Ontology	GO:0034332	1	19	0.00963964	0.0329354	520192	http://amigo.geneontology.org/amigo/term/GO:0034332
pattern specification process	Gene Ontology	GO:0007389	1	21	0.0105988	0.0347642	286771	http://amigo.geneontology.org/amigo/term/GO:0007389
histone acetyltransferase complex	Gene Ontology	GO:0000123	1	21	0.0105988	0.0347642	529373	http://amigo.geneontology.org/amigo/term/GO:0000123
motor neuron axon guidance	Gene Ontology	GO:0008045	1	23	0.0115572	0.0368215	520192	http://amigo.geneontology.org/amigo/term/GO:0008045
positive regulation of JUN kinase activity	Gene Ontology	GO:0043507	1	24	0.012036	0.0368215	520192	http://amigo.geneontology.org/amigo/term/GO:0043507
lipid storage	Gene Ontology	GO:0019915	1	24	0.012036	0.0368215	767984	http://amigo.geneontology.org/amigo/term/GO:0019915
cellular response to organic cyclic compound	Gene Ontology	GO:0071407	1	25	0.0125147	0.0368215	280994	http://amigo.geneontology.org/amigo/term/GO:0071407
histone acetyltransferase activity	Gene Ontology	GO:0004402	1	26	0.0129931	0.0368215	529373	http://amigo.geneontology.org/amigo/term/GO:0004402
histone H3 acetylation	Gene Ontology	GO:0043966	1	26	0.0129931	0.0368215	529373	http://amigo.geneontology.org/amigo/term/GO:0043966
endochondral ossification	Gene Ontology	GO:0001958	1	26	0.0129931	0.0368215	280994	http://amigo.geneontology.org/amigo/term/GO:0001958
face morphogenesis	Gene Ontology	GO:0060325	1	27	0.0134713	0.0368215	286771	http://amigo.geneontology.org/amigo/term/GO:0060325
glycolytic process	Gene Ontology	GO:0006096	1	27	0.0134713	0.0368215	511961	http://amigo.geneontology.org/amigo/term/GO:0006096
integral component of presynaptic membrane	Gene Ontology	GO:0099056	1	27	0.0134713	0.0368215	520192	http://amigo.geneontology.org/amigo/term/GO:0099056
integral component of postsynaptic density membrane	Gene Ontology	GO:0099061	1	29	0.014427	0.0369693	100139490	http://amigo.geneontology.org/amigo/term/GO:0099061
calcium channel activity	Gene Ontology	GO:0005262	1	29	0.014427	0.0369693	614715	http://amigo.geneontology.org/amigo/term/GO:0005262
fatty acid biosynthetic process	Gene Ontology	GO:0006633	1	29	0.014427	0.0369693	511961	http://amigo.geneontology.org/amigo/term/GO:0006633
positive regulation of protein tyrosine kinase activity	Gene Ontology	GO:0061098	1	30	0.0149046	0.0370357	520192	http://amigo.geneontology.org/amigo/term/GO:0061098
histone H4 acetylation	Gene Ontology	GO:0043967	1	30	0.0149046	0.0370357	529373	http://amigo.geneontology.org/amigo/term/GO:0043967
adult walking behavior	Gene Ontology	GO:0007628	1	31	0.0153819	0.0370976	520192	http://amigo.geneontology.org/amigo/term/GO:0007628
anchored component of membrane	Gene Ontology	GO:0031225	1	33	0.016336	0.0377338	280994	http://amigo.geneontology.org/amigo/term/GO:0031225
cellular response to glucose starvation	Gene Ontology	GO:0042149	1	33	0.016336	0.0377338	511961	http://amigo.geneontology.org/amigo/term/GO:0042149
ephrin receptor signaling pathway	Gene Ontology	GO:0048013	1	33	0.016336	0.0377338	520192	http://amigo.geneontology.org/amigo/term/GO:0048013
retrograde vesicle-mediated transport, Golgi to endoplasmic reticulum	Gene Ontology	GO:0006890	1	40	0.0196683	0.0441864	521982	http://amigo.geneontology.org/amigo/term/GO:0006890
SNARE binding	Gene Ontology	GO:0000149	1	42	0.0206185	0.0455171	521982	http://amigo.geneontology.org/amigo/term/GO:0000149
regulation of GTPase activity	Gene Ontology	GO:0043087	1	43	0.0210933	0.0455171	520192	http://amigo.geneontology.org/amigo/term/GO:0043087
positive regulation of fat cell differentiation	Gene Ontology	GO:0045600	1	43	0.0210933	0.0455171	533815	http://amigo.geneontology.org/amigo/term/GO:0045600
activation of protein kinase activity	Gene Ontology	GO:0032147	1	44	0.0215679	0.0457076	533815	http://amigo.geneontology.org/amigo/term/GO:0032147
ATP binding	Gene Ontology	GO:0005524	3	1275	0.021739	0.0457076	533815|520192|511961	http://amigo.geneontology.org/amigo/term/GO:0005524
regulation of catalytic activity	Gene Ontology	GO:0050790	1	47	0.0229902	0.0477266	511961	http://amigo.geneontology.org/amigo/term/GO:0050790
positive regulation of JNK cascade	Gene Ontology	GO:0046330	1	52	0.0253566	0.0519811	533815	http://amigo.geneontology.org/amigo/term/GO:0046330
PDZ domain binding	Gene Ontology	GO:0030165	1	55	0.0267739	0.0531943	100139490	http://amigo.geneontology.org/amigo/term/GO:0030165
regulation of protein stability	Gene Ontology	GO:0031647	1	56	0.0272459	0.0531943	286771	http://amigo.geneontology.org/amigo/term/GO:0031647
positive regulation of protein binding	Gene Ontology	GO:0032092	1	56	0.0272459	0.0531943	533815	http://amigo.geneontology.org/amigo/term/GO:0032092
roof of mouth development	Gene Ontology	GO:0060021	1	56	0.0272459	0.0531943	286771	http://amigo.geneontology.org/amigo/term/GO:0060021
Schaffer collateral - CA1 synapse	Gene Ontology	GO:0098685	1	58	0.0281892	0.0540269	520192	http://amigo.geneontology.org/amigo/term/GO:0098685
central nervous system development	Gene Ontology	GO:0007417	1	59	0.0286606	0.0540269	533815	http://amigo.geneontology.org/amigo/term/GO:0007417
lipid droplet	Gene Ontology	GO:0005811	1	59	0.0286606	0.0540269	767984	http://amigo.geneontology.org/amigo/term/GO:0005811
nucleosome assembly	Gene Ontology	GO:0006334	1	60	0.0291318	0.054291	529373	http://amigo.geneontology.org/amigo/term/GO:0006334
cellular calcium ion homeostasis	Gene Ontology	GO:0006874	1	61	0.0296027	0.0545488	614715	http://amigo.geneontology.org/amigo/term/GO:0006874
dephosphorylation	Gene Ontology	GO:0016311	1	63	0.0305439	0.0546917	280994	http://amigo.geneontology.org/amigo/term/GO:0016311
positive regulation of DNA-binding transcription factor activity	Gene Ontology	GO:0051091	1	64	0.0310142	0.0546917	533815	http://amigo.geneontology.org/amigo/term/GO:0051091
PML body	Gene Ontology	GO:0016605	1	64	0.0310142	0.0546917	529373	http://amigo.geneontology.org/amigo/term/GO:0016605
early endosome membrane	Gene Ontology	GO:0031901	1	65	0.0314843	0.0549301	520192	http://amigo.geneontology.org/amigo/term/GO:0031901
endoplasmic reticulum	Gene Ontology	GO:0005783	2	607	0.0340701	0.0588157	614715|286771	http://amigo.geneontology.org/amigo/term/GO:0005783
positive regulation of protein kinase B signaling	Gene Ontology	GO:0051897	1	73	0.0352374	0.0595766	533815	http://amigo.geneontology.org/amigo/term/GO:0051897
peptidyl-tyrosine phosphorylation	Gene Ontology	GO:0018108	1	83	0.0399098	0.0655513	520192	http://amigo.geneontology.org/amigo/term/GO:0018108
integral component of endoplasmic reticulum membrane	Gene Ontology	GO:0030176	1	84	0.0403758	0.0655513	614715	http://amigo.geneontology.org/amigo/term/GO:0030176
postsynaptic membrane	Gene Ontology	GO:0045211	1	85	0.0408417	0.0655513	100139490	http://amigo.geneontology.org/amigo/term/GO:0045211
collagen-containing extracellular matrix	Gene Ontology	GO:0062023	1	85	0.0408417	0.0655513	512019	http://amigo.geneontology.org/amigo/term/GO:0062023
nucleosome	Gene Ontology	GO:0000786	1	88	0.0422381	0.0655513	529373	http://amigo.geneontology.org/amigo/term/GO:0000786
calcium ion transmembrane transport	Gene Ontology	GO:0070588	1	89	0.0427031	0.0655513	614715	http://amigo.geneontology.org/amigo/term/GO:0070588
cytoplasm	Gene Ontology	GO:0005737	4	2867	0.0430712	0.0655513	614715|533815|520192|511961	http://amigo.geneontology.org/amigo/term/GO:0005737
negative regulation of canonical Wnt signaling pathway	Gene Ontology	GO:0090090	1	98	0.0468789	0.0698922	533815	http://amigo.geneontology.org/amigo/term/GO:0090090
protein kinase activity	Gene Ontology	GO:0004672	1	110	0.0524204	0.0760792	520192	http://amigo.geneontology.org/amigo/term/GO:0004672
protein autophosphorylation	Gene Ontology	GO:0046777	1	113	0.0538011	0.0773981	520192	http://amigo.geneontology.org/amigo/term/GO:0046777
histone binding	Gene Ontology	GO:0042393	1	119	0.0565569	0.080655	529373	http://amigo.geneontology.org/amigo/term/GO:0042393
identical protein binding	Gene Ontology	GO:0042802	2	813	0.0576854	0.0815553	533815|520192	http://amigo.geneontology.org/amigo/term/GO:0042802
postsynaptic density	Gene Ontology	GO:0014069	1	124	0.0588477	0.0817883	100139490	http://amigo.geneontology.org/amigo/term/GO:0014069
angiogenesis	Gene Ontology	GO:0001525	1	136	0.0643245	0.0878004	512019	http://amigo.geneontology.org/amigo/term/GO:0001525
serine-type endopeptidase activity	Gene Ontology	GO:0004252	1	154	0.0724843	0.0943446	514076	http://amigo.geneontology.org/amigo/term/GO:0004252
transcription coactivator activity	Gene Ontology	GO:0003713	1	163	0.0765393	0.0973058	529373	http://amigo.geneontology.org/amigo/term/GO:0003713
transcription factor binding	Gene Ontology	GO:0008134	1	169	0.0792335	0.0999562	529373	http://amigo.geneontology.org/amigo/term/GO:0008134
extracellular matrix	Gene Ontology	GO:0031012	1	172	0.0805779	0.100668	280994	http://amigo.geneontology.org/amigo/term/GO:0031012
axon	Gene Ontology	GO:0030424	1	173	0.0810256	0.100668	520192	http://amigo.geneontology.org/amigo/term/GO:0030424
magnesium ion binding	Gene Ontology	GO:0000287	1	190	0.0886059	0.10764	533815	http://amigo.geneontology.org/amigo/term/GO:0000287
protein serine/threonine kinase activity	Gene Ontology	GO:0004674	1	214	0.0992087	0.118761	533815	http://amigo.geneontology.org/amigo/term/GO:0004674
metal ion binding	Gene Ontology	GO:0046872	2	1164	0.1073	0.126599	286771|280994	http://amigo.geneontology.org/amigo/term/GO:0046872
protein phosphorylation	Gene Ontology	GO:0006468	1	245	0.112735	0.131124	511961	http://amigo.geneontology.org/amigo/term/GO:0006468
Golgi membrane	Gene Ontology	GO:0000139	1	253	0.116194	0.133753	614715	http://amigo.geneontology.org/amigo/term/GO:0000139
synapse	Gene Ontology	GO:0045202	1	254	0.116626	0.133753	100139490	http://amigo.geneontology.org/amigo/term/GO:0045202
negative regulation of transcription, DNA-templated	Gene Ontology	GO:0045892	1	265	0.121361	0.138216	529373	http://amigo.geneontology.org/amigo/term/GO:0045892
nuclear chromatin	Gene Ontology	GO:0000790	1	285	0.129909	0.146931	529373	http://amigo.geneontology.org/amigo/term/GO:0000790
protein-containing complex	Gene Ontology	GO:0032991	1	291	0.132458	0.148249	533815	http://amigo.geneontology.org/amigo/term/GO:0032991
nuclear speck	Gene Ontology	GO:0016607	1	299	0.135846	0.150532	529373	http://amigo.geneontology.org/amigo/term/GO:0016607
protein kinase binding	Gene Ontology	GO:0019901	1	305	0.138379	0.15231	511961	http://amigo.geneontology.org/amigo/term/GO:0019901
cell surface	Gene Ontology	GO:0009986	1	325	0.146773	0.160472	782186	http://amigo.geneontology.org/amigo/term/GO:0009986
proteolysis	Gene Ontology	GO:0006508	1	368	0.164564	0.178732	514076	http://amigo.geneontology.org/amigo/term/GO:0006508
endoplasmic reticulum membrane	Gene Ontology	GO:0005789	1	384	0.171096	0.184603	286771	http://amigo.geneontology.org/amigo/term/GO:0005789
extracellular region	Gene Ontology	GO:0005576	1	454	0.199117	0.213433	514076	http://amigo.geneontology.org/amigo/term/GO:0005576
oxidation-reduction process	Gene Ontology	GO:0055114	1	516	0.223199	0.236564	286771	http://amigo.geneontology.org/amigo/term/GO:0055114
DNA binding	Gene Ontology	GO:0003677	1	517	0.223582	0.236564	529373	http://amigo.geneontology.org/amigo/term/GO:0003677
nucleolus	Gene Ontology	GO:0005730	1	551	0.236495	0.248623	529373	http://amigo.geneontology.org/amigo/term/GO:0005730
zinc ion binding	Gene Ontology	GO:0008270	1	664	0.277994	0.290388	529373	http://amigo.geneontology.org/amigo/term/GO:0008270
plasma membrane	Gene Ontology	GO:0005886	2	2339	0.314994	0.326956	286771|280994	http://amigo.geneontology.org/amigo/term/GO:0005886
cytosol	Gene Ontology	GO:0005829	2	2482	0.341388	0.352124	529373|767984	http://amigo.geneontology.org/amigo/term/GO:0005829
positive regulation of transcription by RNA polymerase II	Gene Ontology	GO:0045944	1	872	0.348955	0.357679	529373	http://amigo.geneontology.org/amigo/term/GO:0045944
extracellular space	Gene Ontology	GO:0005615	1	952	0.37448	0.381458	512019	http://amigo.geneontology.org/amigo/term/GO:0005615
nucleus	Gene Ontology	GO:0005634	2	2955	0.426855	0.432124	529373|511961	http://amigo.geneontology.org/amigo/term/GO:0005634
integral component of membrane	Gene Ontology	GO:0016021	2	3697	0.55056	0.55056	286771|782186	http://amigo.geneontology.org/amigo/term/GO:0016021
--------------------

## Sheet: Sheet2
#Term	Database	ID	Input number	Background number	P-Value	Corrected P-Value	Input	Hyperlink
Thiamine metabolism	KEGG PATHWAY	bta00730	1	18	0.00915972	0.0319616	280994	http://www.genome.jp/kegg-bin/show_pathway?bta00730/bta:280994%09red
Hippo signaling pathway - multiple species	KEGG PATHWAY	bta04392	1	29	0.014427	0.0369693	533815	http://www.genome.jp/kegg-bin/show_pathway?bta04392/bta:533815%09red
Circadian rhythm	KEGG PATHWAY	bta04710	1	31	0.0153819	0.0370976	511961	http://www.genome.jp/kegg-bin/show_pathway?bta04710/bta:511961%09red
Folate biosynthesis	KEGG PATHWAY	bta00790	1	37	0.0182415	0.04155	280994	http://www.genome.jp/kegg-bin/show_pathway?bta00790/bta:280994%09red
Longevity regulating pathway - multiple species	KEGG PATHWAY	bta04213	1	62	0.0300734	0.0546917	511961	http://www.genome.jp/kegg-bin/show_pathway?bta04213/bta:511961%09red
Adipocytokine signaling pathway	KEGG PATHWAY	bta04920	1	72	0.034769	0.059397	511961	http://www.genome.jp/kegg-bin/show_pathway?bta04920/bta:511961%09red
Staphylococcus aureus infection	KEGG PATHWAY	bta05150	1	75	0.0361736	0.0605353	514076	http://www.genome.jp/kegg-bin/show_pathway?bta05150/bta:514076%09red
Complement and coagulation cascades	KEGG PATHWAY	bta04610	1	87	0.0417728	0.0655513	514076	http://www.genome.jp/kegg-bin/show_pathway?bta04610/bta:514076%09red
Longevity regulating pathway	KEGG PATHWAY	bta04211	1	90	0.0431679	0.0655513	511961	http://www.genome.jp/kegg-bin/show_pathway?bta04211/bta:511961%09red
Cardiac muscle contraction	KEGG PATHWAY	bta04260	1	90	0.0431679	0.0655513	286771	http://www.genome.jp/kegg-bin/show_pathway?bta04260/bta:286771%09red
Hypertrophic cardiomyopathy (HCM)	KEGG PATHWAY	bta05410	1	92	0.0440969	0.0663477	511961	http://www.genome.jp/kegg-bin/show_pathway?bta05410/bta:511961%09red
Glucagon signaling pathway	KEGG PATHWAY	bta04922	1	104	0.0496534	0.0733618	511961	http://www.genome.jp/kegg-bin/show_pathway?bta04922/bta:511961%09red
Insulin resistance	KEGG PATHWAY	bta04931	1	110	0.0524204	0.0760792	511961	http://www.genome.jp/kegg-bin/show_pathway?bta04931/bta:511961%09red
AMPK signaling pathway	KEGG PATHWAY	bta04152	1	123	0.0583899	0.0817883	511961	http://www.genome.jp/kegg-bin/show_pathway?bta04152/bta:511961%09red
FoxO signaling pathway	KEGG PATHWAY	bta04068	1	132	0.0625022	0.0861375	511961	http://www.genome.jp/kegg-bin/show_pathway?bta04068/bta:511961%09red
Insulin signaling pathway	KEGG PATHWAY	bta04910	1	137	0.0647796	0.0878004	511961	http://www.genome.jp/kegg-bin/show_pathway?bta04910/bta:511961%09red
Signaling pathways regulating pluripotency of stem cells	KEGG PATHWAY	bta04550	1	139	0.0656891	0.0881913	529373	http://www.genome.jp/kegg-bin/show_pathway?bta04550/bta:529373%09red
Apelin signaling pathway	KEGG PATHWAY	bta04371	1	140	0.0661435	0.0881913	511961	http://www.genome.jp/kegg-bin/show_pathway?bta04371/bta:511961%09red
Hippo signaling pathway	KEGG PATHWAY	bta04390	1	151	0.0711289	0.0939141	533815	http://www.genome.jp/kegg-bin/show_pathway?bta04390/bta:533815%09red
Oxytocin signaling pathway	KEGG PATHWAY	bta04921	1	152	0.0715809	0.0939141	511961	http://www.genome.jp/kegg-bin/show_pathway?bta04921/bta:511961%09red
Non-alcoholic fatty liver disease (NAFLD)	KEGG PATHWAY	bta04932	1	158	0.0742885	0.0957595	511961	http://www.genome.jp/kegg-bin/show_pathway?bta04932/bta:511961%09red
Cell adhesion molecules (CAMs)	KEGG PATHWAY	bta04514	1	159	0.0747391	0.0957595	782186	http://www.genome.jp/kegg-bin/show_pathway?bta04514/bta:782186%09red
Tight junction	KEGG PATHWAY	bta04530	1	178	0.0832612	0.102668	511961	http://www.genome.jp/kegg-bin/show_pathway?bta04530/bta:511961%09red
Axon guidance	KEGG PATHWAY	bta04360	1	180	0.084154	0.102994	520192	http://www.genome.jp/kegg-bin/show_pathway?bta04360/bta:520192%09red
Calcium signaling pathway	KEGG PATHWAY	bta04020	1	203	0.0943634	0.113791	286771	http://www.genome.jp/kegg-bin/show_pathway?bta04020/bta:286771%09red
Epstein-Barr virus infection	KEGG PATHWAY	bta05169	1	228	0.105341	0.125187	782186	http://www.genome.jp/kegg-bin/show_pathway?bta05169/bta:782186%09red
Thermogenesis	KEGG PATHWAY	bta04714	1	239	0.110131	0.129011	511961	http://www.genome.jp/kegg-bin/show_pathway?bta04714/bta:511961%09red
MAPK signaling pathway	KEGG PATHWAY	bta04010	1	292	0.132882	0.148249	533815	http://www.genome.jp/kegg-bin/show_pathway?bta04010/bta:533815%09red
Metabolic pathways	KEGG PATHWAY	bta01100	1	1468	0.518053	0.521232	280994	http://www.genome.jp/kegg-bin/show_pathway?bta01100/bta:280994%09red
--------------------
#Term	Database	ID	Input number	Background number	P-Value	Corrected P-Value	Input	Hyperlink
--------------------
#Term	Database	ID	Input number	Background number	P-Value	Corrected P-Value	Input	Hyperlink
protein stabilization	Gene Ontology	GO:0050821	2	128	0.00176089	0.0306531	533815|520192	http://amigo.geneontology.org/amigo/term/GO:0050821
nephric duct morphogenesis	Gene Ontology	GO:0072178	1	5	0.002901	0.0306531	520192	http://amigo.geneontology.org/amigo/term/GO:0072178
GPI-linked ephrin receptor activity	Gene Ontology	GO:0005004	1	5	0.002901	0.0306531	520192	http://amigo.geneontology.org/amigo/term/GO:0005004
signaling receptor binding	Gene Ontology	GO:0005102	2	171	0.00308755	0.0306531	512019|782186	http://amigo.geneontology.org/amigo/term/GO:0005102
cell differentiation involved in embryonic placenta development	Gene Ontology	GO:0060706	1	6	0.00338374	0.0306531	533815	http://amigo.geneontology.org/amigo/term/GO:0060706
regulation of dendritic spine morphogenesis	Gene Ontology	GO:0061001	1	6	0.00338374	0.0306531	520192	http://amigo.geneontology.org/amigo/term/GO:0061001
MOZ/MORF histone acetyltransferase complex	Gene Ontology	GO:0070776	1	6	0.00338374	0.0306531	529373	http://amigo.geneontology.org/amigo/term/GO:0070776
negative regulation of long-term synaptic potentiation	Gene Ontology	GO:1900272	1	6	0.00338374	0.0306531	520192	http://amigo.geneontology.org/amigo/term/GO:1900272
neural tube formation	Gene Ontology	GO:0001841	1	7	0.00386626	0.0306531	533815	http://amigo.geneontology.org/amigo/term/GO:0001841
nucleotide-activated protein kinase complex	Gene Ontology	GO:0031588	1	7	0.00386626	0.0306531	511961	http://amigo.geneontology.org/amigo/term/GO:0031588
positive regulation of aspartic-type endopeptidase activity involved in amyloid precursor protein catabolic process	Gene Ontology	GO:1902961	1	7	0.00386626	0.0306531	520192	http://amigo.geneontology.org/amigo/term/GO:1902961
hepatocyte apoptotic process	Gene Ontology	GO:0097284	1	8	0.00434857	0.0306531	533815	http://amigo.geneontology.org/amigo/term/GO:0097284
AMP-activated protein kinase activity	Gene Ontology	GO:0004679	1	8	0.00434857	0.0306531	511961	http://amigo.geneontology.org/amigo/term/GO:0004679
protein kinase regulator activity	Gene Ontology	GO:0019887	1	8	0.00434857	0.0306531	511961	http://amigo.geneontology.org/amigo/term/GO:0019887
limb morphogenesis	Gene Ontology	GO:0035108	1	8	0.00434857	0.0306531	286771	http://amigo.geneontology.org/amigo/term/GO:0035108
complement activation, alternative pathway	Gene Ontology	GO:0006957	1	8	0.00434857	0.0306531	514076	http://amigo.geneontology.org/amigo/term/GO:0006957
glutamatergic synapse	Gene Ontology	GO:0098978	2	215	0.00480481	0.0306531	100139490|520192	http://amigo.geneontology.org/amigo/term/GO:0098978
positive regulation of sequestering of triglyceride	Gene Ontology	GO:0010890	1	9	0.00483066	0.0306531	767984	http://amigo.geneontology.org/amigo/term/GO:0010890
AMP binding	Gene Ontology	GO:0016208	1	9	0.00483066	0.0306531	511961	http://amigo.geneontology.org/amigo/term/GO:0016208
positive regulation of extrinsic apoptotic signaling pathway via death domain receptors	Gene Ontology	GO:1902043	1	9	0.00483066	0.0306531	533815	http://amigo.geneontology.org/amigo/term/GO:1902043
negative regulation of organ growth	Gene Ontology	GO:0046621	1	9	0.00483066	0.0306531	533815	http://amigo.geneontology.org/amigo/term/GO:0046621
negative regulation of axon regeneration	Gene Ontology	GO:0048681	1	9	0.00483066	0.0306531	520192	http://amigo.geneontology.org/amigo/term/GO:0048681
H4 histone acetyltransferase activity	Gene Ontology	GO:0010485	1	9	0.00483066	0.0306531	529373	http://amigo.geneontology.org/amigo/term/GO:0010485
myeloid cell differentiation	Gene Ontology	GO:0030099	1	10	0.00531253	0.0306531	529373	http://amigo.geneontology.org/amigo/term/GO:0030099
ER overload response	Gene Ontology	GO:0006983	1	10	0.00531253	0.0306531	614715	http://amigo.geneontology.org/amigo/term/GO:0006983
regulation of postsynaptic neurotransmitter receptor activity	Gene Ontology	GO:0098962	1	10	0.00531253	0.0306531	100139490	http://amigo.geneontology.org/amigo/term/GO:0098962
signal transduction by protein phosphorylation	Gene Ontology	GO:0023014	1	10	0.00531253	0.0306531	533815	http://amigo.geneontology.org/amigo/term/GO:0023014
negative regulation of cell population proliferation	Gene Ontology	GO:0008285	2	228	0.00537981	0.0306531	533815|286771	http://amigo.geneontology.org/amigo/term/GO:0008285
nuclear-transcribed mRNA catabolic process	Gene Ontology	GO:0000956	1	11	0.00579419	0.0306531	521982	http://amigo.geneontology.org/amigo/term/GO:0000956
activation of cysteine-type endopeptidase activity	Gene Ontology	GO:0097202	1	11	0.00579419	0.0306531	286771	http://amigo.geneontology.org/amigo/term/GO:0097202
stress-activated protein kinase signaling cascade	Gene Ontology	GO:0031098	1	11	0.00579419	0.0306531	533815	http://amigo.geneontology.org/amigo/term/GO:0031098
positive regulation of amyloid-beta formation	Gene Ontology	GO:1902004	1	12	0.00627563	0.031188	520192	http://amigo.geneontology.org/amigo/term/GO:1902004
regulation of short-term neuronal synaptic plasticity	Gene Ontology	GO:0048172	1	12	0.00627563	0.031188	100139490	http://amigo.geneontology.org/amigo/term/GO:0048172
endoplasmic reticulum calcium ion homeostasis	Gene Ontology	GO:0032469	1	13	0.00675685	0.0316322	614715	http://amigo.geneontology.org/amigo/term/GO:0032469
regulation of AMPA receptor activity	Gene Ontology	GO:2000311	1	14	0.00723785	0.0316322	100139490	http://amigo.geneontology.org/amigo/term/GO:2000311
glycogen biosynthetic process	Gene Ontology	GO:0005978	1	14	0.00723785	0.0316322	511961	http://amigo.geneontology.org/amigo/term/GO:0005978
biomineral tissue development	Gene Ontology	GO:0031214	1	15	0.00771864	0.0316322	280994	http://amigo.geneontology.org/amigo/term/GO:0031214
response to antibiotic	Gene Ontology	GO:0046677	1	15	0.00771864	0.0316322	280994	http://amigo.geneontology.org/amigo/term/GO:0046677
hippo signaling	Gene Ontology	GO:0035329	1	15	0.00771864	0.0316322	533815	http://amigo.geneontology.org/amigo/term/GO:0035329
cochlea development	Gene Ontology	GO:0090102	1	15	0.00771864	0.0316322	520192	http://amigo.geneontology.org/amigo/term/GO:0090102
integral component of postsynaptic membrane	Gene Ontology	GO:0099055	1	17	0.00867957	0.0316322	520192	http://amigo.geneontology.org/amigo/term/GO:0099055
cellular response to amyloid-beta	Gene Ontology	GO:1904646	1	17	0.00867957	0.0316322	520192	http://amigo.geneontology.org/amigo/term/GO:1904646
regulation of axonogenesis	Gene Ontology	GO:0050770	1	17	0.00867957	0.0316322	520192	http://amigo.geneontology.org/amigo/term/GO:0050770
protein tyrosine kinase binding	Gene Ontology	GO:1990782	1	17	0.00867957	0.0316322	520192	http://amigo.geneontology.org/amigo/term/GO:1990782
cellular senescence	Gene Ontology	GO:0090398	1	17	0.00867957	0.0316322	529373	http://amigo.geneontology.org/amigo/term/GO:0090398
AMPA glutamate receptor complex	Gene Ontology	GO:0032281	1	18	0.00915972	0.0319616	100139490	http://amigo.geneontology.org/amigo/term/GO:0032281
adherens junction organization	Gene Ontology	GO:0034332	1	19	0.00963964	0.0329354	520192	http://amigo.geneontology.org/amigo/term/GO:0034332
pattern specification process	Gene Ontology	GO:0007389	1	21	0.0105988	0.0347642	286771	http://amigo.geneontology.org/amigo/term/GO:0007389
histone acetyltransferase complex	Gene Ontology	GO:0000123	1	21	0.0105988	0.0347642	529373	http://amigo.geneontology.org/amigo/term/GO:0000123
motor neuron axon guidance	Gene Ontology	GO:0008045	1	23	0.0115572	0.0368215	520192	http://amigo.geneontology.org/amigo/term/GO:0008045
positive regulation of JUN kinase activity	Gene Ontology	GO:0043507	1	24	0.012036	0.0368215	520192	http://amigo.geneontology.org/amigo/term/GO:0043507
lipid storage	Gene Ontology	GO:0019915	1	24	0.012036	0.0368215	767984	http://amigo.geneontology.org/amigo/term/GO:0019915
cellular response to organic cyclic compound	Gene Ontology	GO:0071407	1	25	0.0125147	0.0368215	280994	http://amigo.geneontology.org/amigo/term/GO:0071407
histone acetyltransferase activity	Gene Ontology	GO:0004402	1	26	0.0129931	0.0368215	529373	http://amigo.geneontology.org/amigo/term/GO:0004402
histone H3 acetylation	Gene Ontology	GO:0043966	1	26	0.0129931	0.0368215	529373	http://amigo.geneontology.org/amigo/term/GO:0043966
endochondral ossification	Gene Ontology	GO:0001958	1	26	0.0129931	0.0368215	280994	http://amigo.geneontology.org/amigo/term/GO:0001958
face morphogenesis	Gene Ontology	GO:0060325	1	27	0.0134713	0.0368215	286771	http://amigo.geneontology.org/amigo/term/GO:0060325
glycolytic process	Gene Ontology	GO:0006096	1	27	0.0134713	0.0368215	511961	http://amigo.geneontology.org/amigo/term/GO:0006096
integral component of presynaptic membrane	Gene Ontology	GO:0099056	1	27	0.0134713	0.0368215	520192	http://amigo.geneontology.org/amigo/term/GO:0099056
integral component of postsynaptic density membrane	Gene Ontology	GO:0099061	1	29	0.014427	0.0369693	100139490	http://amigo.geneontology.org/amigo/term/GO:0099061
calcium channel activity	Gene Ontology	GO:0005262	1	29	0.014427	0.0369693	614715	http://amigo.geneontology.org/amigo/term/GO:0005262
fatty acid biosynthetic process	Gene Ontology	GO:0006633	1	29	0.014427	0.0369693	511961	http://amigo.geneontology.org/amigo/term/GO:0006633
positive regulation of protein tyrosine kinase activity	Gene Ontology	GO:0061098	1	30	0.0149046	0.0370357	520192	http://amigo.geneontology.org/amigo/term/GO:0061098
histone H4 acetylation	Gene Ontology	GO:0043967	1	30	0.0149046	0.0370357	529373	http://amigo.geneontology.org/amigo/term/GO:0043967
adult walking behavior	Gene Ontology	GO:0007628	1	31	0.0153819	0.0370976	520192	http://amigo.geneontology.org/amigo/term/GO:0007628
anchored component of membrane	Gene Ontology	GO:0031225	1	33	0.016336	0.0377338	280994	http://amigo.geneontology.org/amigo/term/GO:0031225
cellular response to glucose starvation	Gene Ontology	GO:0042149	1	33	0.016336	0.0377338	511961	http://amigo.geneontology.org/amigo/term/GO:0042149
ephrin receptor signaling pathway	Gene Ontology	GO:0048013	1	33	0.016336	0.0377338	520192	http://amigo.geneontology.org/amigo/term/GO:0048013
retrograde vesicle-mediated transport, Golgi to endoplasmic reticulum	Gene Ontology	GO:0006890	1	40	0.0196683	0.0441864	521982	http://amigo.geneontology.org/amigo/term/GO:0006890
SNARE binding	Gene Ontology	GO:0000149	1	42	0.0206185	0.0455171	521982	http://amigo.geneontology.org/amigo/term/GO:0000149
regulation of GTPase activity	Gene Ontology	GO:0043087	1	43	0.0210933	0.0455171	520192	http://amigo.geneontology.org/amigo/term/GO:0043087
positive regulation of fat cell differentiation	Gene Ontology	GO:0045600	1	43	0.0210933	0.0455171	533815	http://amigo.geneontology.org/amigo/term/GO:0045600
activation of protein kinase activity	Gene Ontology	GO:0032147	1	44	0.0215679	0.0457076	533815	http://amigo.geneontology.org/amigo/term/GO:0032147
ATP binding	Gene Ontology	GO:0005524	3	1275	0.021739	0.0457076	533815|520192|511961	http://amigo.geneontology.org/amigo/term/GO:0005524
regulation of catalytic activity	Gene Ontology	GO:0050790	1	47	0.0229902	0.0477266	511961	http://amigo.geneontology.org/amigo/term/GO:0050790
positive regulation of JNK cascade	Gene Ontology	GO:0046330	1	52	0.0253566	0.0519811	533815	http://amigo.geneontology.org/amigo/term/GO:0046330
PDZ domain binding	Gene Ontology	GO:0030165	1	55	0.0267739	0.0531943	100139490	http://amigo.geneontology.org/amigo/term/GO:0030165
regulation of protein stability	Gene Ontology	GO:0031647	1	56	0.0272459	0.0531943	286771	http://amigo.geneontology.org/amigo/term/GO:0031647
positive regulation of protein binding	Gene Ontology	GO:0032092	1	56	0.0272459	0.0531943	533815	http://amigo.geneontology.org/amigo/term/GO:0032092
roof of mouth development	Gene Ontology	GO:0060021	1	56	0.0272459	0.0531943	286771	http://amigo.geneontology.org/amigo/term/GO:0060021
Schaffer collateral - CA1 synapse	Gene Ontology	GO:0098685	1	58	0.0281892	0.0540269	520192	http://amigo.geneontology.org/amigo/term/GO:0098685
central nervous system development	Gene Ontology	GO:0007417	1	59	0.0286606	0.0540269	533815	http://amigo.geneontology.org/amigo/term/GO:0007417
lipid droplet	Gene Ontology	GO:0005811	1	59	0.0286606	0.0540269	767984	http://amigo.geneontology.org/amigo/term/GO:0005811
nucleosome assembly	Gene Ontology	GO:0006334	1	60	0.0291318	0.054291	529373	http://amigo.geneontology.org/amigo/term/GO:0006334
cellular calcium ion homeostasis	Gene Ontology	GO:0006874	1	61	0.0296027	0.0545488	614715	http://amigo.geneontology.org/amigo/term/GO:0006874
dephosphorylation	Gene Ontology	GO:0016311	1	63	0.0305439	0.0546917	280994	http://amigo.geneontology.org/amigo/term/GO:0016311
positive regulation of DNA-binding transcription factor activity	Gene Ontology	GO:0051091	1	64	0.0310142	0.0546917	533815	http://amigo.geneontology.org/amigo/term/GO:0051091
PML body	Gene Ontology	GO:0016605	1	64	0.0310142	0.0546917	529373	http://amigo.geneontology.org/amigo/term/GO:0016605
early endosome membrane	Gene Ontology	GO:0031901	1	65	0.0314843	0.0549301	520192	http://amigo.geneontology.org/amigo/term/GO:0031901
endoplasmic reticulum	Gene Ontology	GO:0005783	2	607	0.0340701	0.0588157	614715|286771	http://amigo.geneontology.org/amigo/term/GO:0005783
positive regulation of protein kinase B signaling	Gene Ontology	GO:0051897	1	73	0.0352374	0.0595766	533815	http://amigo.geneontology.org/amigo/term/GO:0051897
peptidyl-tyrosine phosphorylation	Gene Ontology	GO:0018108	1	83	0.0399098	0.0655513	520192	http://amigo.geneontology.org/amigo/term/GO:0018108
integral component of endoplasmic reticulum membrane	Gene Ontology	GO:0030176	1	84	0.0403758	0.0655513	614715	http://amigo.geneontology.org/amigo/term/GO:0030176
postsynaptic membrane	Gene Ontology	GO:0045211	1	85	0.0408417	0.0655513	100139490	http://amigo.geneontology.org/amigo/term/GO:0045211
collagen-containing extracellular matrix	Gene Ontology	GO:0062023	1	85	0.0408417	0.0655513	512019	http://amigo.geneontology.org/amigo/term/GO:0062023
nucleosome	Gene Ontology	GO:0000786	1	88	0.0422381	0.0655513	529373	http://amigo.geneontology.org/amigo/term/GO:0000786
calcium ion transmembrane transport	Gene Ontology	GO:0070588	1	89	0.0427031	0.0655513	614715	http://amigo.geneontology.org/amigo/term/GO:0070588
cytoplasm	Gene Ontology	GO:0005737	4	2867	0.0430712	0.0655513	614715|533815|520192|511961	http://amigo.geneontology.org/amigo/term/GO:0005737
negative regulation of canonical Wnt signaling pathway	Gene Ontology	GO:0090090	1	98	0.0468789	0.0698922	533815	http://amigo.geneontology.org/amigo/term/GO:0090090
protein kinase activity	Gene Ontology	GO:0004672	1	110	0.0524204	0.0760792	520192	http://amigo.geneontology.org/amigo/term/GO:0004672
protein autophosphorylation	Gene Ontology	GO:0046777	1	113	0.0538011	0.0773981	520192	http://amigo.geneontology.org/amigo/term/GO:0046777
histone binding	Gene Ontology	GO:0042393	1	119	0.0565569	0.080655	529373	http://amigo.geneontology.org/amigo/term/GO:0042393
identical protein binding	Gene Ontology	GO:0042802	2	813	0.0576854	0.0815553	533815|520192	http://amigo.geneontology.org/amigo/term/GO:0042802
postsynaptic density	Gene Ontology	GO:0014069	1	124	0.0588477	0.0817883	100139490	http://amigo.geneontology.org/amigo/term/GO:0014069
angiogenesis	Gene Ontology	GO:0001525	1	136	0.0643245	0.0878004	512019	http://amigo.geneontology.org/amigo/term/GO:0001525
serine-type endopeptidase activity	Gene Ontology	GO:0004252	1	154	0.0724843	0.0943446	514076	http://amigo.geneontology.org/amigo/term/GO:0004252
transcription coactivator activity	Gene Ontology	GO:0003713	1	163	0.0765393	0.0973058	529373	http://amigo.geneontology.org/amigo/term/GO:0003713
transcription factor binding	Gene Ontology	GO:0008134	1	169	0.0792335	0.0999562	529373	http://amigo.geneontology.org/amigo/term/GO:0008134
extracellular matrix	Gene Ontology	GO:0031012	1	172	0.0805779	0.100668	280994	http://amigo.geneontology.org/amigo/term/GO:0031012
axon	Gene Ontology	GO:0030424	1	173	0.0810256	0.100668	520192	http://amigo.geneontology.org/amigo/term/GO:0030424
magnesium ion binding	Gene Ontology	GO:0000287	1	190	0.0886059	0.10764	533815	http://amigo.geneontology.org/amigo/term/GO:0000287
protein serine/threonine kinase activity	Gene Ontology	GO:0004674	1	214	0.0992087	0.118761	533815	http://amigo.geneontology.org/amigo/term/GO:0004674
metal ion binding	Gene Ontology	GO:0046872	2	1164	0.1073	0.126599	286771|280994	http://amigo.geneontology.org/amigo/term/GO:0046872
protein phosphorylation	Gene Ontology	GO:0006468	1	245	0.112735	0.131124	511961	http://amigo.geneontology.org/amigo/term/GO:0006468
Golgi membrane	Gene Ontology	GO:0000139	1	253	0.116194	0.133753	614715	http://amigo.geneontology.org/amigo/term/GO:0000139
synapse	Gene Ontology	GO:0045202	1	254	0.116626	0.133753	100139490	http://amigo.geneontology.org/amigo/term/GO:0045202
negative regulation of transcription, DNA-templated	Gene Ontology	GO:0045892	1	265	0.121361	0.138216	529373	http://amigo.geneontology.org/amigo/term/GO:0045892
nuclear chromatin	Gene Ontology	GO:0000790	1	285	0.129909	0.146931	529373	http://amigo.geneontology.org/amigo/term/GO:0000790
protein-containing complex	Gene Ontology	GO:0032991	1	291	0.132458	0.148249	533815	http://amigo.geneontology.org/amigo/term/GO:0032991
nuclear speck	Gene Ontology	GO:0016607	1	299	0.135846	0.150532	529373	http://amigo.geneontology.org/amigo/term/GO:0016607
protein kinase binding	Gene Ontology	GO:0019901	1	305	0.138379	0.15231	511961	http://amigo.geneontology.org/amigo/term/GO:0019901
cell surface	Gene Ontology	GO:0009986	1	325	0.146773	0.160472	782186	http://amigo.geneontology.org/amigo/term/GO:0009986
proteolysis	Gene Ontology	GO:0006508	1	368	0.164564	0.178732	514076	http://amigo.geneontology.org/amigo/term/GO:0006508
endoplasmic reticulum membrane	Gene Ontology	GO:0005789	1	384	0.171096	0.184603	286771	http://amigo.geneontology.org/amigo/term/GO:0005789
extracellular region	Gene Ontology	GO:0005576	1	454	0.199117	0.213433	514076	http://amigo.geneontology.org/amigo/term/GO:0005576
oxidation-reduction process	Gene Ontology	GO:0055114	1	516	0.223199	0.236564	286771	http://amigo.geneontology.org/amigo/term/GO:0055114
DNA binding	Gene Ontology	GO:0003677	1	517	0.223582	0.236564	529373	http://amigo.geneontology.org/amigo/term/GO:0003677
nucleolus	Gene Ontology	GO:0005730	1	551	0.236495	0.248623	529373	http://amigo.geneontology.org/amigo/term/GO:0005730
zinc ion binding	Gene Ontology	GO:0008270	1	664	0.277994	0.290388	529373	http://amigo.geneontology.org/amigo/term/GO:0008270
plasma membrane	Gene Ontology	GO:0005886	2	2339	0.314994	0.326956	286771|280994	http://amigo.geneontology.org/amigo/term/GO:0005886
cytosol	Gene Ontology	GO:0005829	2	2482	0.341388	0.352124	529373|767984	http://amigo.geneontology.org/amigo/term/GO:0005829
positive regulation of transcription by RNA polymerase II	Gene Ontology	GO:0045944	1	872	0.348955	0.357679	529373	http://amigo.geneontology.org/amigo/term/GO:0045944
extracellular space	Gene Ontology	GO:0005615	1	952	0.37448	0.381458	512019	http://amigo.geneontology.org/amigo/term/GO:0005615
nucleus	Gene Ontology	GO:0005634	2	2955	0.426855	0.432124	529373|511961	http://amigo.geneontology.org/amigo/term/GO:0005634
integral component of membrane	Gene Ontology	GO:0016021	2	3697	0.55056	0.55056	286771|782186	http://amigo.geneontology.org/amigo/term/GO:0016021
--------------------
